# Supplementary material for: Neurofibromatosis Type 1 Has a Wide Spectrum of Growth Hormone Excess
Source: MDPI journal article supplement (doi:10.3390/jcm11082168), 2022-04-13
Supplement: s1 [file s1]

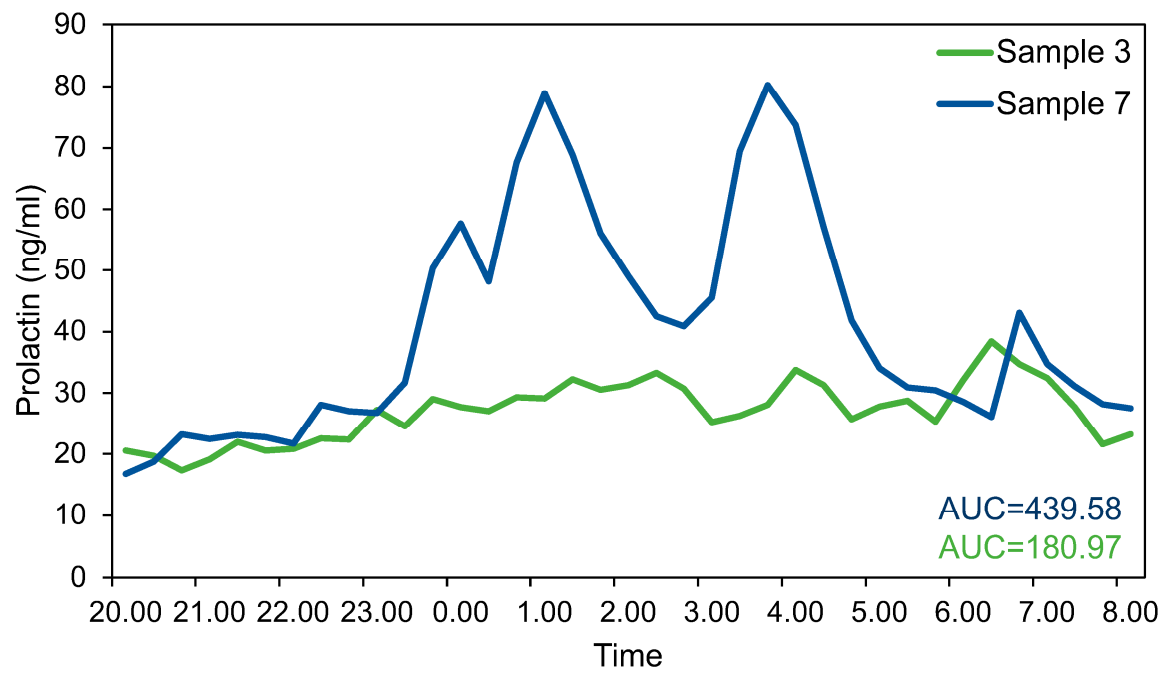

**Figure S1.** Overnight sampling of prolactin in two patients (#3 and 7) with NF1 and GH excess. Elevated prolactin levels in patient 7 (blue line) were observed.
